# Supplementary material for: Structure and photoluminescence property of two-dimensional coordination polymer complexes involving CuI6X6(X = Cl, Br, I) hexagon prism cluster supported by a tripodal tripyridine ligand with 1,3,5-triethylbenzene spacer
Source: Royal Society of Chemistry journal article supplement (doi:10.1039/b508747c), 2005-01-01
Supplement: b508747c.pdf [file b508747c.pdf]

## Supporting Information

for

**Structure and photoluminescence property of two-dimensional coordination polymer complexes involving  $\text{Cu}^{\text{I}}\text{X}_6$  (X = Cl, Br, I) hexagon prism cluster supported by a tripodal tripyridine ligand with 1,3,5-triethylbenzen spacer**

Hiromi Ohi,<sup>a</sup> Yoshimitsu Tachi,<sup>a</sup> Takashi Kunimoto,<sup>b</sup> and Shinobu Itoh<sup>\*a</sup>

<sup>a</sup>*Department of Chemistry, Graduate School of Science, Osaka City University, 3-3-138 Sugimoto, Sumiyoshi-ku, Osaka 558-8585, Japan and* <sup>b</sup>*Department of Nano and Bio Material Engineering, Tokushima Bunri University, Shido, Sanukicity, Kagawa 769-2193, Japan*

## Experimental

**General.** Reagents and solvents used in this study except the ligand and complexes were commercial products of the highest available purity and were further purified by the standard methods, if necessary.<sup>1</sup> Ligand L and  $[\text{Cu}^{\text{I}}(\text{CH}_3\text{CN})_4](\text{PF}_6)$  have been synthesized according to the reported methods.<sup>2,3</sup> FT-IR spectra were recorded with a Shimadzu FTIR-8200PC. UV-vis spectra were obtained on a Hewlett Packard 8453 photo diode array spectrophotometer. Reflection spectra of the solid sample (rubbed on a filter paper) were taken on a Shimadzu UV2550 with the integrating-sphere attachment ISR-2200. Fluorescence spectra of the solid sample (rubbed on a filter paper) were taken on a JASCO FP-6300. Mass spectra were obtained on a JEOL JMS-700T Tandem MS-station mass spectrometer. Elemental analysis was carried out on a Perkin-Elmer 240C or a Fisons instruments EA1108 Elemental Analyzer.

**X-ray Structure Determination.** The single crystal was mounted on a glass-fiber. Data of X-ray diffraction were collected by a Rigaku RAXIS-RAPID imaging plate two-dimensional area detector using graphite-monochromated  $\text{MoK}\alpha$  radiation ( $\lambda = 0.71069 \text{ \AA}$ ) to  $2\theta$  max of  $55^\circ$ . All the crystallographic calculations were performed by using Crystal Structure software package of the Molecular Structure Corporation [Crystal Structure: Crystal Structure Analysis Package version 3.7.0, Molecular Structure Corp. and Rigaku Corp. (2000-2005)]. The crystal structures were solved by the direct methods and refined by the full-matrix least squares using SHELX97 (for  $[\text{Cu}^{\text{I}}\text{Cl}_6\text{L}_2]_n$  and  $[\text{Cu}^{\text{I}}\text{Br}_6\text{L}_2]_n$ ) and SIR92 (for  $[\text{Cu}^{\text{I}}\text{I}_6\text{L}_2]_n$  and  $[\text{Cu}^{\text{I}}\text{L}]\text{PF}_6$ ). All non-hydrogen atoms and hydrogen atoms were refined anisotropically and isotropically, respectively. Atomic coordinates, thermal parameters, and intramolecular bond distances and angles are deposited in the supplementary materials (CIF file format).

## Synthesis

$([\text{Cu}^{\text{I}}\text{Cl}_6\text{L}_2])_n$ . A solution of L (326.7 mg, 0.684 mmol) in acetone (2.0 mL) was

added slowly to a suspension of  $\text{Cu}^{\text{I}}\text{Cl}$  (203.7 mg, 2.05 mmol) in acetone (8.0 mL) under anaerobic conditions (in a glove box DBO-1KP (Miwa Co. Ltd.);  $[\text{O}_2] < 1$  ppm,  $[\text{H}_2\text{O}] < 1$  ppm). White powder was immediately precipitated. After the mixture was stirred for additional 27 h, the precipitate was collected by filtration to give white powder (486.0 mg, 92%). Single crystals suitable for the X-ray analysis were obtained by recrystallization from a mixed solvent system consisted of  $\text{CHCl}_3/\text{CH}_3\text{CN}$  ( $v : v = 1 : 1$ )/ $\text{Et}_2\text{O}$ . IR (KBr): 772, 2868, 2903, 2926, and 2961  $\text{cm}^{-1}$ ; Anal. calcd for  $[\text{Cu}^{\text{I}}_6\text{Cl}_6\text{L}_2]_n$ ,  $\text{C}_{33}\text{H}_{39}\text{Cl}_3\text{Cu}_3\text{N}_3$ : C; 51.16, H; 5.07, N; 5.42. found for C; 50.96, H; 4.99, N; 5.43.; UV-vis (solid sample):  $\lambda_{\text{max}} = 215$ , 265, and 345 nm.

$[(\text{Cu}^{\text{I}}_6\text{Br}_6\text{L}_2)]_n$ . In the glove box ( $[\text{O}_2] < 1$  ppm,  $[\text{H}_2\text{O}] < 1$  ppm), single crystals suitable for the X-ray analysis were obtained by liquid-phase diffusion between a  $\text{CH}_3\text{CN}$  solution (12.0 mL) of  $\text{Cu}^{\text{I}}\text{Br}$  (30.5 mg,  $21.3 \times 10^{-5}$  mol) and a  $\text{CH}_2\text{Cl}_2$  solution (3.0 mL) of L (33.5 mg,  $7.0 \times 10^{-5}$  mol) in a glass tube ( $\phi = 0.6$  cm) (25.4 mg, 40%). IR (KBr): 770, 2868, 2903, 2926, and 2963  $\text{cm}^{-1}$ ; Anal. calcd for  $[\text{Cu}^{\text{I}}_6\text{Br}_6\text{L}_2]_n$ ,  $\text{C}_{33}\text{H}_{39}\text{Br}_3\text{Cu}_3\text{N}_3$ : C; 43.67, H; 4.23, N; 4.63. found for C; 43.65, H; 4.33, N; 4.63; UV-vis (solid sample):  $\lambda_{\text{max}} = 215$ , 265, 300, and 345 nm.

$[(\text{Cu}^{\text{I}}_6\text{I}_6\text{L}_2)]_n$ . Single crystals suitable for the X-ray analysis were obtained by liquid-phase diffusion between a  $\text{CH}_3\text{CN}$  solution (80.0 mL) of  $\text{Cu}^{\text{I}}\text{I}$  (596.0 mg,  $3.13 \times 10^{-3}$  mol) and a  $\text{CH}_2\text{Cl}_2$  solution (20.0 mL) of L (494.9 mg,  $1.04 \times 10^{-3}$  mol) in a glass tube ( $\phi = 0.6$  cm) (658.0 mg, 65%). IR (KBr): 752, 768, 2866, 2903, and 2966  $\text{cm}^{-1}$ ; Anal. calcd for  $[\text{Cu}^{\text{I}}_6\text{I}_6\text{L}_2]_n$ ,  $\text{C}_{33}\text{H}_{39}\text{Cu}_3\text{I}_3\text{N}_3$ : C; 37.79, H; 3.63, N; 4.03. found for C; 37.79, H; 3.75, N; 4.01; UV-vis (solid sample):  $\lambda_{\text{max}} = 220$ , 263, and 305 nm.

$[\text{Cu}^{\text{I}}(\text{L})](\text{PF}_6)$ . To a suspension of  $[\text{Cu}_1(\text{CH}_3\text{CN})_4](\text{PF}_6)$  (70.3 mg, 0.189 mmol) in acetone (0.5 mL) was added slowly a solution of L (90.0 mg, 0.189 mmol) in acetone (3.0 mL) under anaerobic conditions (in a glove box,  $[\text{O}_2] < 1$  ppm,  $[\text{H}_2\text{O}] < 1$  ppm). The suspension was turned to a yellow solution. After stirring for 25 h, insoluble materials were removed by filtration. The filtrate was concentrated by evaporation under reduced pressure.

Addition of Et<sub>2</sub>O (15 mL) to the residue gave pale yellow precipitate. Careful decantation of the precipitate gave pale yellow powder (107.5 mg, 83%). Single crystals suitable for the X-ray analysis were obtained by recrystallization from CH<sub>2</sub>Cl<sub>2</sub>/hexane. IR (KBr): 841 (PF<sub>6</sub><sup>-1</sup>) cm<sup>-1</sup>; HRMS (FAB, pos):  $m/z = 540.2435$  calcd for ([Cu<sup>1</sup>+L]<sup>+</sup>, C<sub>33</sub>H<sub>39</sub>CuN<sub>3</sub>, 540.2440); Anal. calcd for [Cu<sup>1</sup>(L)](PF<sub>6</sub>), C<sub>33</sub>H<sub>39</sub>CuF<sub>6</sub>N<sub>3</sub>P: C; 57.76, H; 5.73, N; 6.12. found for C; 57.89, H; 5.75, N; 6.10; UV-vis: (solid sample)  $\lambda_{\text{max}} = 220, 267, \text{ and } 310 \text{ nm}$ , (1.0 x 10<sup>-4</sup> M, CH<sub>2</sub>Cl<sub>2</sub>)  $\lambda_{\text{max}} = 303 \text{ nm}$ , (1.0 x 10<sup>-4</sup> M, acetonitrile)  $\lambda_{\text{max}} = 256, 262, \text{ and } 268 \text{ nm}$ .

## References

- 1 W. L. F. Armarego, D. D. Perrin, In *Purification of Laborator Chemicals*, 4<sup>th</sup> ed. Butterworth-Heinemann; Oxford, 1996; pp176 and 215.
- 2 H. Ohi, Y. Tachi, S. Itoh, *Inorg. Chem.* 2004, **43**, 4561.
- 3 G. J. Kubas, *Inorg. Synth.* 1979, **19**, 90.

**Figure S1**

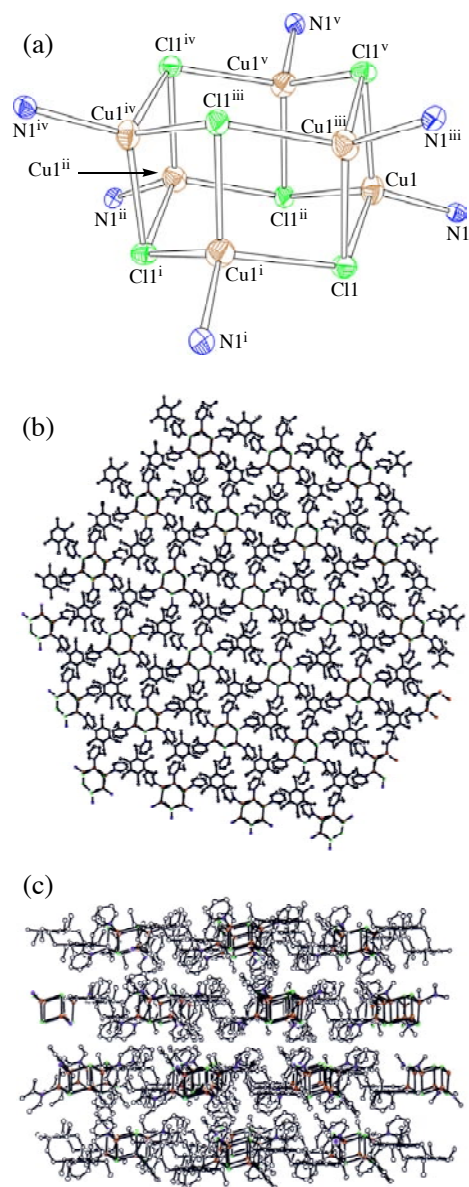

**Figure S1.** ORTEP drawings of  $[\text{Cu}_6\text{Cl}_6\text{L}_2]_n$  showing 50% probability thermal ellipsoid; (a) the  $[\text{Cu}_6\text{Cl}_6\text{L}_2]$  core structure, (b) a top view, and (c) a side view. Hydrogen atoms are omitted for clarity. Symmetry codes:  $i = (2-x+y, 2-x, z)$ ,  $ii = (2-y, x-y, z)$ ,  $iii = (2/3+y, 4/3-x+y, 1/3-z)$ ,  $iv = (8/3-x, 4/3-y, 1/3-z)$ ,  $v = (2/3+x-y, -2/3+x, 1/3-x)$ .

**Table S1.** Summary of X-ray Crystallographic Data

| Compound                                | $([\text{Cu}^{\text{I}}_6\text{Cl}_6\text{L}_2])_n$          |
|-----------------------------------------|--------------------------------------------------------------|
| formula                                 | $\text{C}_{33}\text{H}_{39}\text{N}_3\text{Cu}_3\text{Cl}_3$ |
| formula weight                          | 774.69                                                       |
| crystal system                          | trigonal                                                     |
| space group                             | $R\bar{3}$ (#148)                                            |
| $a$ , Å                                 | 15.029(4)                                                    |
| $b$ , Å                                 | 15.029(4)                                                    |
| $c$ , Å                                 | 23.744(8)                                                    |
| $\alpha$ , deg                          | 90                                                           |
| $\beta$ , deg                           | 90                                                           |
| $\gamma$ , deg                          | 120                                                          |
| $V$ , Å <sup>3</sup>                    | 4644.7(24)                                                   |
| $Z$                                     | 6                                                            |
| $F(000)$                                | 2376.00                                                      |
| $D_{\text{calcd}}$ , g/cm <sup>-3</sup> | 1.662                                                        |
| $T$ , K                                 | 163                                                          |
| crystal size, mm                        | 0.25 x 0.25 x 0.08                                           |
| $\mu$ (MoK $\alpha$ ), cm <sup>-1</sup> | 23.298                                                       |
| $2\theta_{\text{max}}$ , deg            | 55.0                                                         |
| no. of reflns measd                     | 14463                                                        |
| no. of reflns obsd                      | 1948 ( $[I > 2.00\sigma(I)]$ )                               |
| no. of variables                        | 141                                                          |
| $R^a$ , $R_w^b$                         | 0.0254, 0.0272                                               |
| goodness of fit indicator               | 1.023                                                        |

$$^a R = \sum ||F_o| - |F_c|| / \sum |F_o| \quad ^b R_w = [ \sum w (|F_o| - |F_c|)^2 / \sum w F_o^2 ]^{1/2}$$

**Table S2.** Selected Bond Lengths (Å) and Angles (deg) of  $([\text{Cu}^{\text{I}}_6\text{Cl}_6\text{L}_2])_n^{\text{a}}$ 

---

| Selected bond length   |           |                       |            |
|------------------------|-----------|-----------------------|------------|
| Cu1-Cl1                | 2.4265(5) | Cu1-Cl1 <sup>ii</sup> | 2.3660(8)  |
| Cu1-Cl1 <sup>v</sup>   | 2.3943(5) | Cu1-N1                | 2.0155(18) |
| Cu1-Cu1 <sup>iii</sup> | 2.9281(3) | Cu1-Cu1 <sup>i</sup>  | 4.0969(3)  |
| Cu1-Cu1 <sup>iv</sup>  | 5.0357(3) |                       |            |

  

| Selected bond angles                     |            |                                         |             |
|------------------------------------------|------------|-----------------------------------------|-------------|
| Cl1-Cu1-Cl1 <sup>ii</sup>                | 107.66(2)  | Cl1-Cu1-Cl1 <sup>v</sup>                | 103.441(18) |
| Cl1-Cu1-N1                               | 107.16(5)  | Cl1 <sup>ii</sup> -Cu1-Cl1 <sup>v</sup> | 105.31(2)   |
| Cl1 <sup>ii</sup> -Cu1-N1                | 115.58(6)  | Cl1 <sup>v</sup> -Cu1-N1                | 116.74(5)   |
| Cu1-Cl1-Cu1 <sup>iii</sup>               | 74.799(15) | Cu1-Cl1-Cu1 <sup>i</sup>                | 117.48(2)   |
| Cu1 <sup>iii</sup> -Cl1-Cu1 <sup>i</sup> | 75.918(16) |                                         |             |

---

<sup>a</sup>Estimated standard deviations are given in parentheses.

**Figure S2**

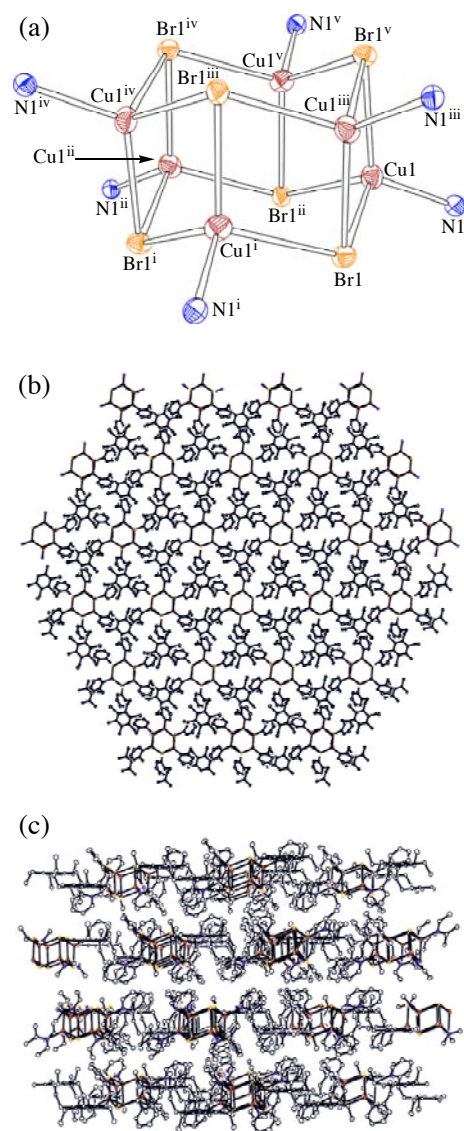

**Figure S2.** ORTEP drawings of  $[\text{Cu}_6\text{Br}_6\text{L}_2]_n$  showing 50% probability thermal ellipsoid; (a) the  $[\text{Cu}_6\text{Br}_6\text{L}_2]$  core structure, (b) a top view, and (c) a side view. Hydrogen atoms are omitted for clarity. Symmetry codes:  $i = (2-x+y, 2-x, z)$ ,  $ii = (2-y, x-y, z)$ ,  $iii = (2/3+y, 4/3-x+y, 1/3-z)$ ,  $iv = (8/3-x, 4/3-y, 1/3-z)$ ,  $v = (2/3+x-y, -2/3+x, 1/3-x)$ .



**Table S3.** Summary of X-ray Crystallographic Data

| Compound                                | $([\text{Cu}^{\text{I}}_6 \text{Br}_6 \text{L}_2])_n$        |
|-----------------------------------------|--------------------------------------------------------------|
| formula                                 | $\text{C}_{33}\text{H}_{39}\text{N}_3\text{Cu}_3\text{Br}_3$ |
| formula weight                          | 908.04                                                       |
| crystal system                          | trigonal                                                     |
| space group                             | $R\bar{3}$ (#148)                                            |
| $a$ , Å                                 | 15.1677(9)                                                   |
| $b$ , Å                                 | 15.1677(9)                                                   |
| $c$ , Å                                 | 24.4621(18)                                                  |
| $\alpha$ , deg                          | 90                                                           |
| $\beta$ , deg                           | 90                                                           |
| $\gamma$ , deg                          | 120                                                          |
| $V$ , Å <sup>3</sup>                    | 4873.8(5)                                                    |
| $Z$                                     | 6                                                            |
| $F(000)$                                | 2700.00                                                      |
| $D_{\text{calcd}}$ , g/cm <sup>-3</sup> | 1.856                                                        |
| $T$ , K                                 | 163                                                          |
| crystal size, mm                        | 0.28 x 0.20 x 0.10                                           |
| $\mu$ (MoK $\alpha$ ), cm <sup>-1</sup> | 56.746                                                       |
| $2\theta_{\text{max}}$ , deg            | 55.0                                                         |
| no. of reflns measd                     | 15918                                                        |
| no. of reflns obsd                      | 2121 ( $[I > 2.00\sigma(I)]$ )                               |
| no. of variables                        | 141                                                          |
| $R^a$ , $R_w^b$                         | 0.0237, 0.0264                                               |
| goodness of fit indicator               | 1.018                                                        |

$$^a R = \sum ||F_o| - |F_c|| / \sum |F_o| \quad ^b R_w = [ \sum w (|F_o| - |F_c|)^2 / \sum w F_o^2 ]^{1/2}$$

**Table S4.** Selected Bond Lengths (Å) and Angles (deg) of  $([\text{Cu}^{\text{I}}_6\text{Br}_6\text{L}_2])_n^{\text{a}}$ 

---

| Selected bond length   |           |                        |           |
|------------------------|-----------|------------------------|-----------|
| Cu1-Br1                | 2.5582(4) | Cu1- Br1 <sup>ii</sup> | 2.5101(6) |
| Cu1- Br1 <sup>v</sup>  | 2.4713(3) | Cu1-N1                 | 2.034(2)  |
| Cu1-Cu1 <sup>iii</sup> | 2.9263(4) | Cu1-Cu1 <sup>i</sup>   | 4.2370(4) |
| Cu1-Cu1 <sup>iv</sup>  | 5.1493(5) |                        |           |

  

| Selected bond angles                     |             |                                         |             |
|------------------------------------------|-------------|-----------------------------------------|-------------|
| Br1-Cu1-Br1 <sup>ii</sup>                | 104.564(16) | Br1-Cu1-Br1 <sup>v</sup>                | 107.442(14) |
| Br1-Cu1-N1                               | 106.47(6)   | Br1 <sup>ii</sup> -Cu1-Br1 <sup>v</sup> | 108.97(2)   |
| Br1 <sup>ii</sup> -Cu1-N1                | 110.96(7)   | Br1 <sup>v</sup> -Cu1-N1                | 117.55(6)   |
| Cu1-Br1-Cu1 <sup>iii</sup>               | 71.136(12)  | Cu1-Br1-Cu1 <sup>i</sup>                | 13.433(18)  |
| Cu1 <sup>iii</sup> -Br1-Cu1 <sup>i</sup> | 71.948(13)  |                                         |             |

---

<sup>a</sup>Estimated standard deviations are given in parentheses.

**Figure S3**

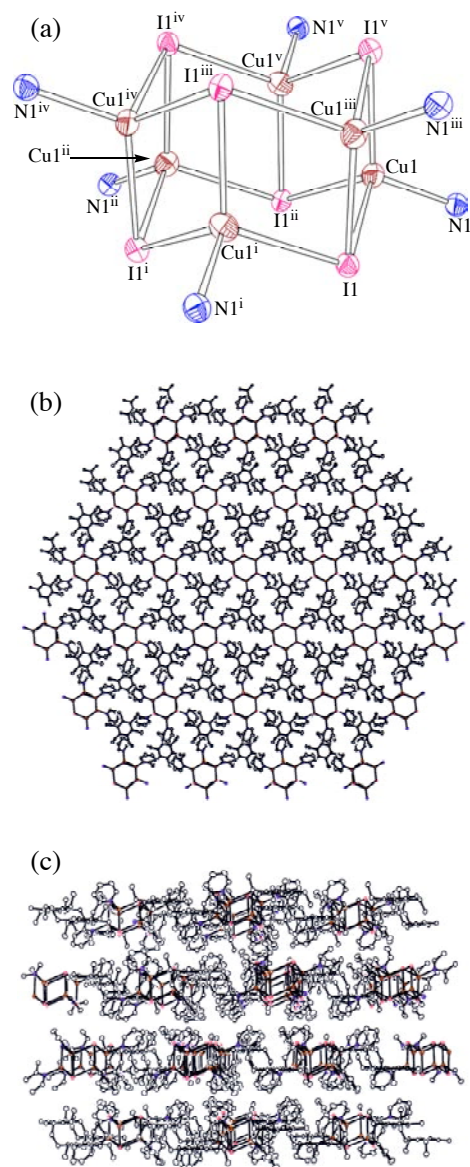

**Figure S3.** ORTEP drawings of  $([\text{Cu}^{\text{I}}_6\text{I}_6\text{L}_2])_n$  showing 50% probability thermal ellipsoid; (a) the  $[\text{Cu}^{\text{I}}_6\text{I}_6\text{L}_2]$  core structure, (b) a top view, and (c) a side view. Hydrogen atoms are omitted for clarity. Symmetry codes: i =  $(2-x+y, 2-x, z)$ , ii =  $(2-y, x-y, z)$ , iii =  $(y+2/3, 4/3-x+y, 1/3-z)$ , iv =  $(8/3-x, 4/3-y, 1/3-z)$ , v =  $(2/3+x-y, -2/3+x, 1/3-x)$ .

**Table S5.** Summary of X-ray Crystallographic Data

| Compound                                | $([\text{Cu}^{\text{I}}_6 \text{I}_6 \text{L}_2])_n$        |
|-----------------------------------------|-------------------------------------------------------------|
| formula                                 | $\text{C}_{33}\text{H}_{39}\text{N}_3\text{Cu}_3\text{I}_3$ |
| formula weight                          | 1049.04                                                     |
| crystal system                          | trigonal                                                    |
| space group                             | $R\bar{3}$ (#148)                                           |
| $a$ , Å                                 | 15.3547(17)                                                 |
| $b$ , Å                                 | 15.3547(17)                                                 |
| $c$ , Å                                 | 25.539(5)                                                   |
| $\alpha$ , deg                          | 90                                                          |
| $\beta$ , deg                           | 90                                                          |
| $\gamma$ , deg                          | 120                                                         |
| $V$ , Å <sup>3</sup>                    | 5214.5(12)                                                  |
| $Z$                                     | 6                                                           |
| $F(000)$                                | 3024.00                                                     |
| $D_{\text{calcd}}$ , g/cm <sup>-3</sup> | 2.004                                                       |
| $T$ , K                                 | 163                                                         |
| crystal size, mm                        | 0.09 x 0.07 x 0.15                                          |
| $\mu$ (MoK $\alpha$ ), cm <sup>-1</sup> | 45.109                                                      |
| $2\theta_{\text{max}}$ , deg            | 54.9                                                        |
| no. of reflns measd                     | 16836                                                       |
| no. of reflns obsd                      | 2142 ( $[I > 2.00\sigma(I)]$ )                              |
| no. of variables                        | 141                                                         |
| $R^a$ , $R_w^b$                         | 0.0203, 0.0230                                              |
| goodness of fit indicator               | 1.032                                                       |

$$^a R = \sum ||F_o| - |F_c|| / \sum |F_o| \quad ^b R_w = [ \sum w (|F_o| - |F_c|)^2 / \sum w F_o^2 ]^{1/2}$$

**Table S6.** Selected Bond Lengths (Å) and Angles (deg) of  $([\text{Cu}_6\text{I}_6\text{L}_2])_n^a$ 

---

| Selected bond length   |           |                      |           |
|------------------------|-----------|----------------------|-----------|
| Cu1-I1                 | 2.7248(4) | Cu1-I1 <sup>ii</sup> | 2.6628(5) |
| Cu1-I1 <sup>v</sup>    | 2.5991(5) | Cu1-N1               | 2.063(2)  |
| Cu1-Cu1 <sup>iii</sup> | 2.9645(5) | Cu1-Cu1 <sup>i</sup> | 4.3834(4) |
| Cu1-Cu1 <sup>iv</sup>  | 5.2918(6) |                      |           |

  

| Selected bond angles                    |             |                                       |             |
|-----------------------------------------|-------------|---------------------------------------|-------------|
| I1-Cu1-I1 <sup>ii</sup>                 | 102.451(16) | I1-Cu1-I1 <sup>v</sup>                | 110.755(15) |
| I1-Cu1-N1                               | 106.68(7)   | I1 <sup>ii</sup> -Cu1-I1 <sup>v</sup> | 112.75(2)   |
| I1 <sup>ii</sup> -Cu1-N1                | 106.61(8)   | I1 <sup>v</sup> -Cu1-N1               | 116.49(7)   |
| Cu1-I1-Cu1 <sup>iii</sup>               | 67.627(14)  | Cu1-I1-Cu1 <sup>i</sup>               | 108.895(16) |
| Cu1 <sup>iii</sup> -I1-Cu1 <sup>i</sup> | 68.570(15)  |                                       |             |

---

<sup>a</sup>Estimated standard deviations are given in parentheses.

**Figure S4**

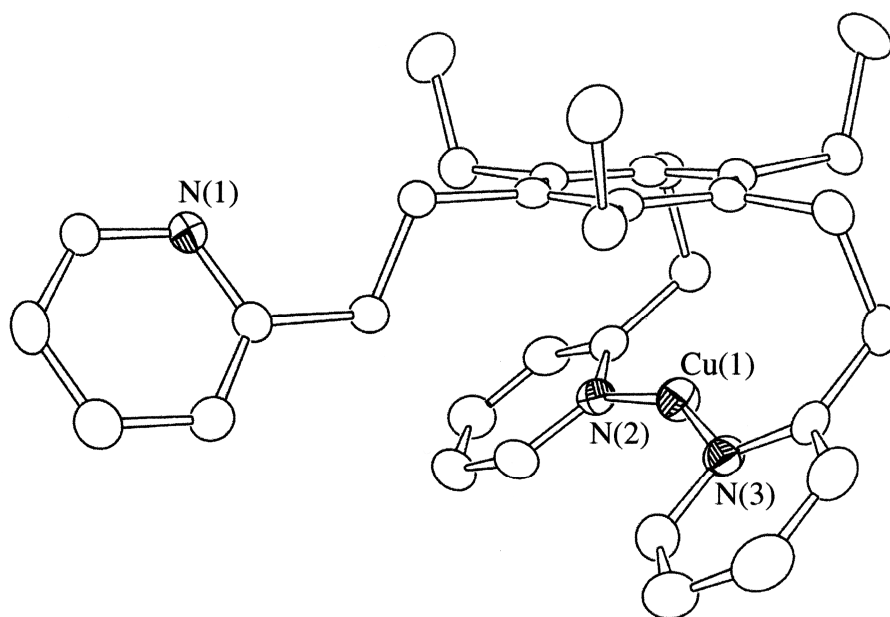

**Figure S4.** An ORTEP drawing of [Cu<sup>I</sup>L](PF<sub>6</sub>) showing 50% probability thermal ellipsoid. Hydrogen atoms and counter anion are omitted for clarity.

**Table S7.** Summary of X-ray Crystallographic Data

| Compound                                                   | [Cu <sup>I</sup> L](PF <sub>6</sub> )                            |
|------------------------------------------------------------|------------------------------------------------------------------|
| formula                                                    | C <sub>33</sub> H <sub>39</sub> N <sub>3</sub> CuPF <sub>6</sub> |
| formula weight                                             | 686.20                                                           |
| crystal system                                             | triclinic                                                        |
| space group                                                | <i>P</i> -1 (#2)                                                 |
| <i>a</i> , Å                                               | 10.027(4)                                                        |
| <i>b</i> , Å                                               | 10.254(3)                                                        |
| <i>c</i> , Å                                               | 16.081(6)                                                        |
| $\alpha$ , deg                                             | 82.509(14)                                                       |
| $\beta$ , deg                                              | 77.487(19)                                                       |
| $\gamma$ , deg                                             | 82.478(17)                                                       |
| <i>V</i> , Å <sup>3</sup>                                  | 1591.3(10)                                                       |
| <i>Z</i>                                                   | 2                                                                |
| <i>F</i> (000)                                             | 712.00                                                           |
| <i>D</i> <sub>calcd</sub> , g/cm <sup>-3</sup>             | 1.432                                                            |
| <i>T</i> , K                                               | 160                                                              |
| crystal size, mm                                           | 0.22 x 0.30 x 0.15                                               |
| $\mu$ (MoK $\alpha$ ), cm <sup>-1</sup>                    | 7.995                                                            |
| $2\theta_{\text{max}}$ , deg                               | 55.0                                                             |
| no. of reflns measd                                        | 15670                                                            |
| no. of reflns obsd                                         | 5961 ( $[I > 2.00\sigma(I)]$ )                                   |
| no. of variables                                           | 436                                                              |
| <i>R</i> <sup>a</sup> , <i>R</i> <sub>w</sub> <sup>b</sup> | 0.0400, 0.0593                                                   |
| goodness of fit indicator                                  | 1.002                                                            |

$${}^a R = \sum ||F_o| - |F_c|| / \sum |F_o| \quad {}^b R_w = [ \sum w (|F_o| - |F_c|)^2 / \sum w F_o^2 ]^{1/2}$$

**Table S8.** Selected Bond Lengths (Å) and Angles (deg) of [Cu<sup>I</sup>L](PF<sub>6</sub>)<sup>a</sup>

---

Selected bond length

Cu1-N2                      1.9182(16)

Cu1-N3                      1.9176(16)

Selected bond angles

N1-Cu1-N2                      154.11(7)

---

<sup>a</sup>Estimated standard deviations are given in parentheses.



**Figure S5**

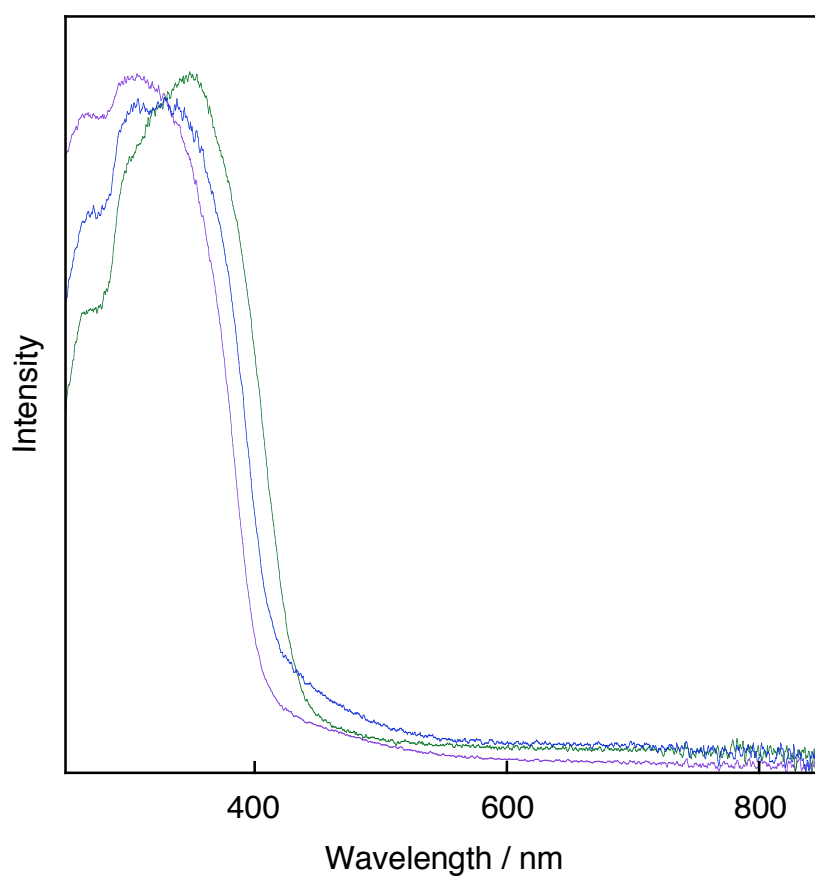

**Figure S5.** Reflection spectra of 2D polymer complexes  $([\text{Cu}^{\text{I}}\text{X}_6\text{L}_2])_n$  (green; X = Cl, blue; X = Br, purple; X = I). Maximum intensities normalized.

**Figure S6**

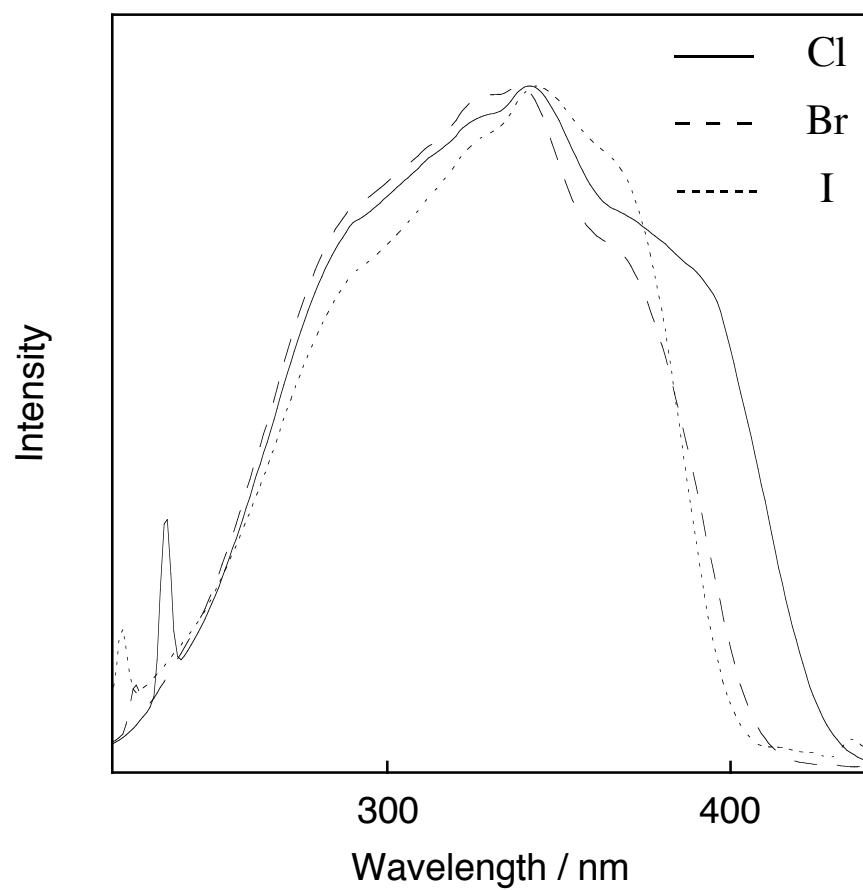

**Figure S6.** Excitation spectra of the solid sample of  $[\text{Cu}^{\text{I}}\text{X}_6\text{L}_2]_n$ : excitation spectra monitoring at 476nm ( $\text{X} = \text{Cl}$ ,  $\lambda^{\text{ex}}_{\text{max}} = 341$  nm), 455 nm ( $\text{X} = \text{Br}$ ,  $\lambda^{\text{ex}}_{\text{max}} = 339$  nm), and 448 nm ( $\text{X} = \text{I}$ ,  $\lambda^{\text{ex}}_{\text{max}} = 343$  nm). Maximum intensities normalized.
